# Supplementary material for: Danicamtiv Increases Myosin Recruitment and Alters Cross-Bridge Cycling in Cardiac Muscle
Source: PubMed Central journal article supplement — Circ Res. 2023 Jul 20;133(5):430–43. doi: 10.1161/CIRCRESAHA.123.322629 (PMC10434831; doi:10.1161/circresaha.123.322629), 2023-07-20
Supplement: res-133-430-s002.pdf [file res-133-430-s002.pdf]

## Major Resources Table

### Animals

| Species           | Vendor or Source  | Background Strain | Sex  | Persistent ID / URL                                                                                                                 |
|-------------------|-------------------|-------------------|------|-------------------------------------------------------------------------------------------------------------------------------------|
| Yucatan Mini-pigs | Exemplar Genetics | N/A               | Male | <a href="https://precigen.com/companies/precigen-exemplar/">https://precigen.com/companies/precigen-exemplar/</a><br>PMID: 34365814 |

### Genetically Modified Animals

|           | Species | Vendor or Source | Background Strain | Other Information            | Persistent ID / URL                                                                                 |
|-----------|---------|------------------|-------------------|------------------------------|-----------------------------------------------------------------------------------------------------|
| I61Q cTnC | Mouse   | Davis Lab        | FVB               | FVB-Tg(Myh6/tetO-Tnnc1*I61Q) | <a href="https://www.jax.org/strain/030371">https://www.jax.org/strain/030371</a><br>PMID: 27114035 |

### Data & Code Availability

| Description      | Source / Repository | Persistent ID / URL                                                                               |
|------------------|---------------------|---------------------------------------------------------------------------------------------------|
| MuscleX Software | Github              | <a href="https://musclex.readthedocs.io/en/latest/">https://musclex.readthedocs.io/en/latest/</a> |
|                  |                     |                                                                                                   |

### Other

| Description          | Source / Repository | Persistent ID / URL                                                                                                         |
|----------------------|---------------------|-----------------------------------------------------------------------------------------------------------------------------|
| Danicamtiv           | MedChemExpress      | <a href="https://www.medchemexpress.com/danicamtiv.html">https://www.medchemexpress.com/danicamtiv.html</a>                 |
| Omecamtiv Mecarbil   | MedChemExpress      | <a href="https://www.medchemexpress.com/Omecamtiv-mecarbil.html">https://www.medchemexpress.com/Omecamtiv-mecarbil.html</a> |
| GraphPad Prism 9.5.1 | GraphPad Software   | <a href="https://www.graphpad.com/scientificsoftware/">https://www.graphpad.com/scientificsoftware/</a>                     |

## ARRIVE GUIDELINES

The ARRIVE guidelines (<https://arriveguidelines.org/>) are a checklist of recommendations to improve the reporting of research involving animals. Key elements of the study design should be included below to better enable readers to scrutinize the research adequately, evaluate its methodological rigor, and reproduce the methods or findings.

### Study Design

| Groups    | Sex | Age         | Number (prior to experiment) | Number (after termination) | Littermates (Yes/No) | Other description |
|-----------|-----|-------------|------------------------------|----------------------------|----------------------|-------------------|
| WT        | M/F | 12-18 weeks | 10                           | 10                         | Yes                  |                   |
| I61Q cTnC | M/F | 12-18 weeks | 11                           | 10                         | Yes                  |                   |

**Sample Size:** Please explain how the sample size was decided Please provide details of any a *prior* sample size calculation, if done.

**Inclusion Criteria:** All mice with appropriate genotype were enrolled in the study.

**Exclusion Criteria:** None.

**Randomization:** Yes

**Blinding:** Person analyzing the echocardiogram was blinded to the treatment or genotype group.
